# Supplementary material
Source: PubMed Central journal article supplement (PMC7956162)
Supplement: NIHMS1666162-supplement-1.pdf [file NIHMS1666162-supplement-1.pdf]

## SUPPLEMENTARY FIGURE LEGENDS

### **Figure S1.** Predicted isoforms of GRDN-1.

Conserved protein domains and premature termination codons in *grdn-1* alleles are shown. GCV indicates the predicted PDZ-binding motif.

### **Figure S2.** Localization of the presynaptic protein SNB-1 is unaffected in AQR in *grdn-1* mutants.

Images showing localization of *gcy-32p::SNB-1::tagRFP* in adult AQR neurons of wild-type and *grdn-1* mutant animals. AQR was visualized with *gcy-37p::GFP*. Percent of animals showing the depicted SNB-1::tagRFP localization pattern in AQR is indicated. a – axon; d – dendrite; anterior is at left. Scale bar: 10  $\mu$ m.

### **Figure S3.** Localization and expression of SAX-7 and DYF-7 in AQR neurons.

**(A)** A subset of optical sections from a confocal *z*-stack showing localization of the endogenously tagged SAX-7::GFP in AQR of wild-type and *grdn-1* mutant larvae. AQR was labeled with *egl-17p::myr-mCherry*. White arrowheads mark dendrites and cell bodies; yellow arrowheads mark axons. In all image panels, anterior is at left; scale bars: 5  $\mu$ m.

**(B)** Images of *dyf-7p::sfGFP::DYF-7* expression in AQR in wild-type larvae. White arrows point to sfGFP::DYF-7 signal in AQR. AQR was labeled with *egl-17p::myr-mCherry*. Proportion of animals with the depicted sfGFP::DYF-7 localization pattern is indicated. Yellow arrows mark presumed sfGFP::DYF-7 expressed in cells other than AQR. sfGFP – superfolder GFP.

(C) Quantification of *gcy-36p::GRDN-1::GFP* localization in AQR in wild-type and *sax-7* animals. Numbers indicate number of AQR neurons examined per genotype. ns – not significantly different from wild-type (Fisher's exact test).

**Figure S4.** HMR-1 knockdown in AQR does not disrupt neuronal morphology.

Quantification of HMR-1::GFP fluorescence intensity in AQR (A), and AQR morphology (B) in the indicated experimental conditions. Each dot in (A) represents the value from a single AQR neuron; bars are mean  $\pm$  SD. Numbers in bars in (B) indicate the number of AQR neurons examined per genotype. \*\*\* indicates different from wild-type at  $P < 0.001$  (Student t-test with Welch's correction).

**Figure S5.** UNC-116 does not play a major role in regulating PQR morphology and cilium position but regulates AQR dendritic microtubule polarity.

(A-B) Representative images (A) and quantification (B) of PQR morphologies in adult wild-type and *unc-116* mutant animals. Images are classified into different phenotypic categories for quantification in (B). P-value in (B) derived from Fisher's exact test.

(C) Quantification of dendrite length in adult wild-type and *unc-116* mutant animals. \*\*\* indicates different from wild-type at  $P < 0.001$  (Student t-test with Welch's correction).

(D-E) Images (D) and quantification (E) of *gcy-32p::ARL-13::tagRFP* localization in PQR of wild-type and *unc-116* mutant animals. PQR was visualized with *gcy-37p::GFP*. ns – not significantly different from wild type (Fisher's exact test).

F) Kymographs of *gcy-36p::EBP-2::GFP* movement in adult AQR dendrites in wild-type and *unc-116* mutant animals. Horizontal scale bars: 5s.

**(G)** Quantification of microtubule polarity in adult AQR dendrites of wild-type and *unc-116* mutants. Each data point represents measurements from an individual AQR neuron. Only neurites with five or more events were used in the analysis. Errors are mean  $\pm$  SD. \*\* indicates different from wild-type at  $P < 0.01$  (Student's t-test with Welch's correction). In all image panels, a – axon; d – dendrite; anterior is at left; scale bars: 10  $\mu$ m. In all bar graphs, numbers indicate number of PQR neurons examined per genotype.

**Table S1.** Strains used in this work.

| Strain                           | Genotype                                                                                                                                                                       | Source                                     |
|----------------------------------|--------------------------------------------------------------------------------------------------------------------------------------------------------------------------------|--------------------------------------------|
| PY11316                          | <i>ials25[gcy-37p::gfp, unc-119(+)]</i> ; <i>oyEx645[gcy-32p::arl-13::tagRFP, unc-122p::mCherry]</i>                                                                           | This work                                  |
| PY11318                          | <i>oyEx640[grdn-1p::grdn-1a::gfp, gcy-32p::mCherry]</i>                                                                                                                        | This work                                  |
| PY11361                          | <i>oyEx641[gcy-32p::arl-13::tagRFP, gcy-36p::grdn-1a::gfp, unc-122p::dsRed]</i>                                                                                                | This work                                  |
| PY11379                          | <i>oyEx642[gcy-32p::xbx-1::tagRFP, gcy-36p::grdn-1a::gfp, unc-122p::dsRed]</i>                                                                                                 | This work                                  |
| PY11327                          | <i>ials25[gcy-37p::gfp, unc-119(+)]</i> ; <i>oyEx643[gcy-36p::dyf-19::tagRFP, unc-122p::mCherry]</i>                                                                           | This work                                  |
| PY11340                          | <i>casIs165[egl-17p::myr-mCherry, pRF4(+)]</i> ; <i>oyEx644[gcy-36p::grdn-1a::gfp, srg-47p::gfp]</i>                                                                           | This work                                  |
| PY11326                          | <i>ials25[gcy-37p::gfp, unc-119(+)]</i> ; <i>grdn-1(ns303)</i> ; <i>oyEx643[gcy-36p::dyf-19::tagRFP, unc-122p::mCherry]</i>                                                    | This work                                  |
| PY11350                          | <i>ials25[gcy-37p::gfp, unc-119(+)]</i> ; <i>grdn-1(hmn1)</i> ; <i>oyEx643[gcy-36p::dyf-19::tagRFP, unc-122p::mCherry]</i>                                                     | This work                                  |
| PY11342                          | <i>ials25[gcy-37p::gfp, unc-119(+)]</i> ; <i>grdn-1(ns303)</i> ; <i>oyEx645[gcy-32p::arl-13::tagRFP, unc-122p::mCherry]</i>                                                    | This work                                  |
| PY11317                          | <i>ials25[gcy-37p::gfp, unc-119(+)]</i> ; <i>grdn-1(hmn1)</i> ; <i>oyEx645[gcy-32p::arl-13::tagRFP, unc-122p::mCherry]</i>                                                     | This work                                  |
| PY11330                          | <i>ials25[gcy-37p::gfp, unc-119(+)]</i> ; <i>grdn-1(hmn1)</i> ; <i>oyEx646[grdn-1p::grdn-1a, unc-122p::dsRed]</i> ; <i>oyEx647[gcy-32p::arl-13::tagRFP, unc-122p::gfp]</i>     | This work                                  |
| PY11359                          | <i>ials25[gcy-37p::gfp, unc-119(+)]</i> ; <i>grdn-1(hmn1)</i> ; <i>oyEx645[gcy-32p::arl-13::tagRFP, unc-122p::mCherry]</i> ; <i>oyEx669[rab-3p::grdn-1DGCV, unc-122p::gfp]</i> | This work                                  |
| ZG610                            | <i>ials25[gcy-37p::gfp, unc-119(+)]</i>                                                                                                                                        | CGC                                        |
| PY9445                           | <i>ials25[gcy-37p::gfp, unc-119(+)]</i> ; <i>grdn-1(ns303)</i>                                                                                                                 | This work                                  |
| PY11341                          | <i>[gcy-37p::gfp, unc-119(+)]</i> ; <i>grdn-1(hmn1)</i>                                                                                                                        | This work                                  |
| PY11376                          | <i>ials25[gcy-37p::gfp, unc-119(+)]</i> ; <i>grdn-1(hmn1)</i> ; <i>oyEx653[grdn-1p::grdn-1a, unc-122p::dsRed]</i>                                                              | This work                                  |
| PY11378                          | <i>ials25[gcy-37p::gfp, unc-119(+)]</i> ; <i>grdn-1(hmn1)</i> ; <i>oyEx646[grdn-1p::grdn-1a, unc-122p::dsRed]</i>                                                              | This work                                  |
| PY11344                          | <i>ials25[gcy-37p::gfp, unc-119(+)]</i> ; <i>grdn-1(hmn1)</i> ; <i>oyEx670[grdn-1p::grdn-1DGCV, unc-122p::mCherry]</i>                                                         | This work                                  |
| PY11321<br>(derived from GOU812) | <i>casIs165[egl-17p::myr-mCherry, pRF4(+)]</i>                                                                                                                                 | A gift of G. Ou (Tsinghua University, PRC) |
| PY11322                          | <i>casIs165[egl-17p::myr-mCherry, pRF4(+)]</i> ; <i>grdn-1(hmn1)</i>                                                                                                           | This work                                  |
| PY11352                          | <i>casIs165[egl-17p::myr-mCherry, pRF4(+)]</i> ; <i>grdn-1(hmn1)</i> ; <i>oyEx650[rab-3p::grdn-1::gfp, srg-47p::gfp]</i>                                                       | This work                                  |
| PY11364                          | <i>casIs165[egl-17p::myr-mCherry, pRF4(+)]</i> ; <i>grdn-1(hmn1)</i> ; <i>oyEx652[rab-3p::grdn-1DGCV, unc-122p::gfp]</i>                                                       | This work                                  |
| PY11377                          | <i>casIs165[egl-17p::myr-mCherry, pRF4(+)]</i> ; <i>grdn-1(hmn1)</i>                                                                                                           | This work                                  |

|         |                                                                                                                                                      |                          |
|---------|------------------------------------------------------------------------------------------------------------------------------------------------------|--------------------------|
| PY11337 | <i>oyEx651[rab-3p::grdn-1DGCV, unc-122p::gfp]</i><br><i>ials25[gcy-37p::gfp, unc-119(+)]</i> ; <i>oyEx648[gcy-32p::snb-1::tagRFP, unc-122p::gfp]</i> | This work                |
| PY11338 | <i>ials25[gcy-37p::gfp, unc-119(+)]</i> ; <i>grdn-1(hmn1)</i> ;<br><i>oyEx648[gcy-32p::snb-1::tagRFP, unc-122p::gfp]</i>                             | This work                |
| PY11324 | <i>cp21[hmr-1::gfp + LoxP]</i> ; <i>casIs165[egl-17p::myr-mCherry, pRF4(+)]</i>                                                                      | This work                |
| PY11355 | <i>casIs165[egl-17p::myr-mCherry, pRF4(+)]</i> ; <i>ddlS290[sax-7::TY1::egfp::3xflag(92C12) + unc-119(+)]</i>                                        | This work                |
| PY11380 | <i>ials25[egl-17p::myr-mCherry, pRF4(+)]</i> ; <i>hmnEx146[dyf-7p::sfGFP::dyf-7, pRF4(+)]</i>                                                        | This work                |
| PY11349 | <i>casIs165[egl-17p::myr-mCherry, pRF4(+)]</i> ; <i>dlg-1(cp301[dlg-1::mNG-C1^3xflag])</i>                                                           | This work                |
| PY11346 | <i>cp21[hmr-1::gfp + LoxP]</i> ; <i>casIs165[egl-17p::myr-mCherry, pRF4(+)]</i> ; <i>grdn-1(ns303)</i>                                               | This work                |
| PY11325 | <i>cp21[hmr-1::gfp + LoxP]</i> ; <i>casIs165[egl-17p::myr-mCherry, pRF4(+)]</i> ; <i>grdn-1(hmn1)</i>                                                | This work                |
| PY11371 | <i>casIs165[egl-17p::myr-mCherry, pRF4(+)]</i> ; <i>ddlS290 [sax-7::TY1::egfp::3xflag(92C12) + unc-119(+)]</i> ; <i>grdn-1(hmn1)</i>                 | This work                |
| PY11370 | <i>casIs165[egl-17p::myr-mCherry, pRF4(+)]</i> ; <i>sax-7(nj48)</i> ;<br><i>oyEx644[gcy-36p::grdn-1a::gfp, srg-47p::gfp]</i>                         | This work                |
| PY11347 | <i>hmr-1(hd37)</i> ; <i>ials25[gcy-37p::gfp, unc-119(+)]</i> ;<br><i>oyEx645[gcy-32p::arl-13::tagRFP, unc-122p::mCherry]</i>                         | This work                |
| PY11372 | <i>hmr-1(oy157[hmr-1::AID+gfp])</i> ; <i>oyIs89[gcy-36p::myr-tagRFP]</i> ; <i>oyEx656[gcy-32p::TIR1, unc-122p::dsRed]</i>                            | This work                |
| PY11368 | <i>hmr-1(oy157[hmr-1::AID+gfp])</i> ; <i>casIs165[egl-17p::myr-mCherry, pRF4(+)]</i> ; <i>oyEx655[gcy-32p::TIR1, unc-122p::dsRed]</i>                | This work                |
| PY11348 | <i>ials25[gcy-37p::gfp, unc-119(+)]</i> ; <i>sax-7(ky146)</i> ;<br><i>oyEx645[gcy-32p::arl-13::tagRFP, unc-122p::mCherry]</i>                        | This work                |
| PY11360 | <i>ials25[gcy-37p::gfp, unc-119(+)]</i> ; <i>sax-7(eq1)</i> ; <i>oyEx645[gcy-32p::arl-13::tagRFP, unc-122p::mCherry]</i>                             | This work                |
| PY11359 | <i>ials25[gcy-37p::gfp, unc-119(+)]</i> ; <i>sax-7(nj48)</i> ; <i>oyEx645[gcy-32p::arl-13::tagRFP, unc-122p::mCherry]</i>                            | This work                |
| PY11374 | <i>hmr-1(hd37)</i> ; <i>ials25[gcy-37p::gfp, unc-119(+)]</i> ; <i>sax-7(nj48)</i> ;<br><i>oyEx645[gcy-32p::arl-13::tagRFP, unc-122p::mCherry]</i>    | This work                |
| PY11335 | <i>unc-116(e2310)</i> ; <i>casIs165[egl-17p::myr-mCherry, pRF4(+)]</i> ;<br><i>oyEx644[gcy-36p::grdn-1a::gfp, srg-47p::gfp]</i>                      | This work                |
| PY11334 | <i>cp21[hmr-1::gfp + LoxP]</i> ; <i>unc-116(e2310)</i> ; <i>casIs165[egl-17p::myr-mCherry, pRF4(+)]</i>                                              | This work                |
| PY11345 | <i>unc-116(e2310)</i> ; <i>ials25[gcy-37p::gfp, unc-119(+)]</i> ;<br><i>oyEx645[gcy-32p::arl-13::tagRFP, unc-122p::mCherry]</i>                      | This work                |
| PY11351 | <i>unc-116(ce815)</i> ; <i>casIs165[egl-17p::myr-mCherry;pRF4(+)]</i>                                                                                | This work                |
| PY11375 | <i>unc-116(ce815)</i> ; <i>casIs165[egl-17p::myr-mCherry, pRF4(+)]</i> ;<br><i>oyEx654[tag-168p::Cre, unc-122p::gfp]</i>                             | This work                |
| STR66   | <i>hrtSi4[gcy-36p::ebp-2::gfp]</i>                                                                                                                   | (Harterink et al., 2018) |
| NWM037  | <i>unc-116(e2310)</i> ; <i>hrtSi4[gcy-36p::ebp-2::gfp]</i>                                                                                           | This work                |
| NWM001  | <i>lin-44(n1792)</i> ; <i>casIs165[egl-17p::myr-mCherry;pRF4(+)]</i> ;<br><i>oyEx644[gcy-36p::grdn-1a::gfp, srg-47p::gfp]</i>                        | This work                |

|        |                                                                                                                 |           |
|--------|-----------------------------------------------------------------------------------------------------------------|-----------|
| NWM002 | <i>lin-44(n1792); ials25[gcy-37p::gfp, unc-119(+)];<br/>oyEx645[gcy-32p::arl-13::tagRFP, unc-122p::mCherry]</i> | This work |
| NWM041 | <i>lin-17(n671); casIs165[egl-17p::myr-mCherry;pRF4(+)];<br/>oyEx644[gcy-36p::grdn-1a::gfp, srg-47p::gfp]</i>   | This work |

---

**Table S2.** Plasmids used in this work.

| <b>Plasmid</b> | <b>Description</b>                    | <b>Source</b>               |
|----------------|---------------------------------------|-----------------------------|
| PSAB1002       | <i>grdn-1p::grdn-1a::gfp</i>          | (Nechipurenko et al., 2016) |
| PSAB1215       | <i>gcy-32p::arl-13::tagRFP</i>        | This work                   |
| PSAB1217       | <i>gcy-36p::grdn-1a::gfp</i>          | This work                   |
| PSAB1218       | <i>gcy-32p::xbx-1::tagRFP</i>         | This work                   |
| PSAB1216       | <i>gcy-36p::dyf-19::tagRFP</i>        | This work                   |
| PSAB988        | <i>grdn-1p::grdn-1a</i>               | (Nechipurenko et al., 2016) |
| PSAB1219       | <i>rab-3p::grdn-1<sup>ΔGCV</sup></i>  | This work                   |
| PSAB1220       | <i>grdn-1p::grdn-1<sup>ΔGCV</sup></i> | This work                   |
| PSAB1221       | <i>rab-3p::grdn-1a::gfp</i>           | This work                   |
| PSAB1013       | <i>srg-47p::gfp</i>                   | (Nechipurenko et al., 2016) |
| PSAB1222       | <i>gcy-32p::snb-1::tagRFP</i>         | This work                   |
| PSAB1223       | <i>gcy-32p::TIR1</i>                  | This work                   |
| pSF11          | <i>tag-168p::Cre (nCre)</i>           | (Flavell et al., 2013)      |

## REFERENCES

- Flavell, S.W., Pokala, N., Macosko, E.Z., Albrecht, D.R., Larsch, J., and Bargmann, C.I. (2013). Serotonin and the neuropeptide PDF initiate and extend opposing behavioral states in *C. elegans*. *Cell* *154*, 1023-1035.
- Harterink, M., Edwards, S.L., de Haan, B., Yau, K.W., van den Heuvel, S., Kapitein, L.C., Miller, K.G., and Hoogenraad, C.C. (2018). Local microtubule organization promotes cargo transport in *C. elegans* dendrites. *J Cell Sci* *131*, jcs223107.
- Nechipurenko, I.V., Olivier-Mason, A., Kazatskaya, A., Kennedy, J., McLachlan, I.G., Heiman, M.G., Blacque, O.E., and Sengupta, P. (2016). A conserved role for Girdin in basal body positioning and ciliogenesis. *Dev Cell* *38*, 493-506.



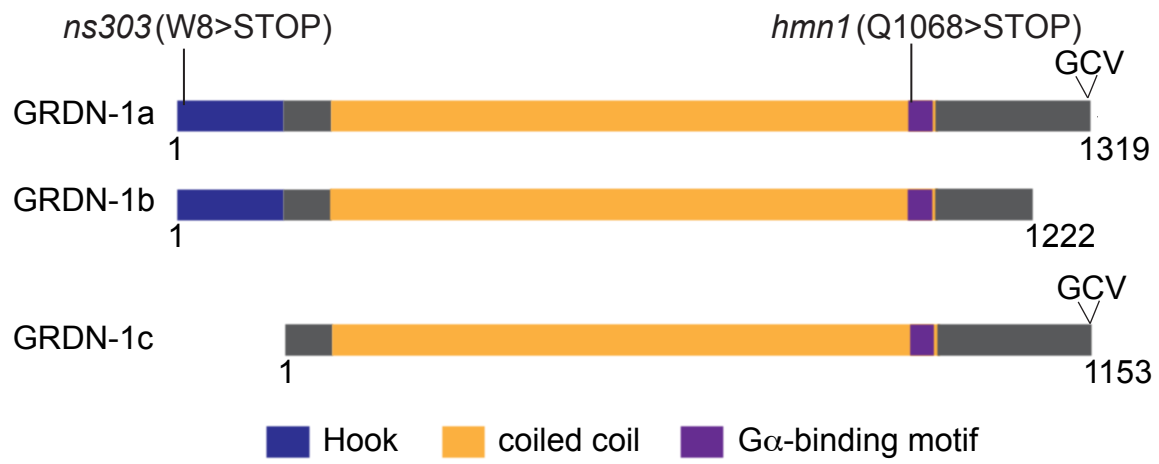

Figure S1

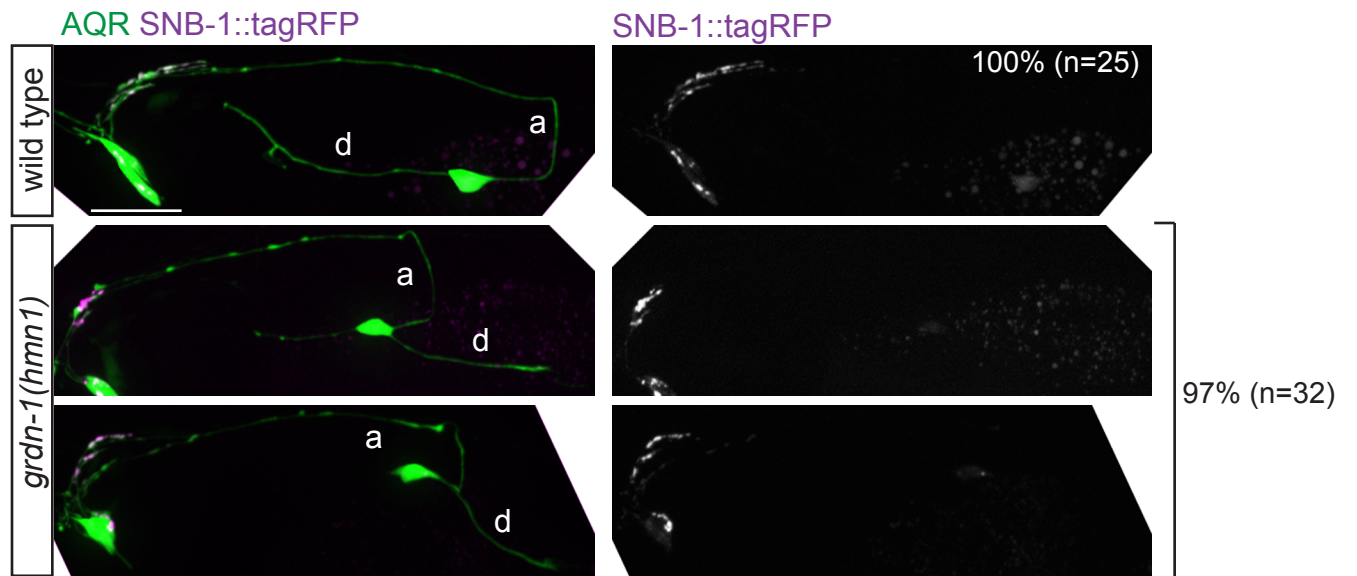

Figure S2

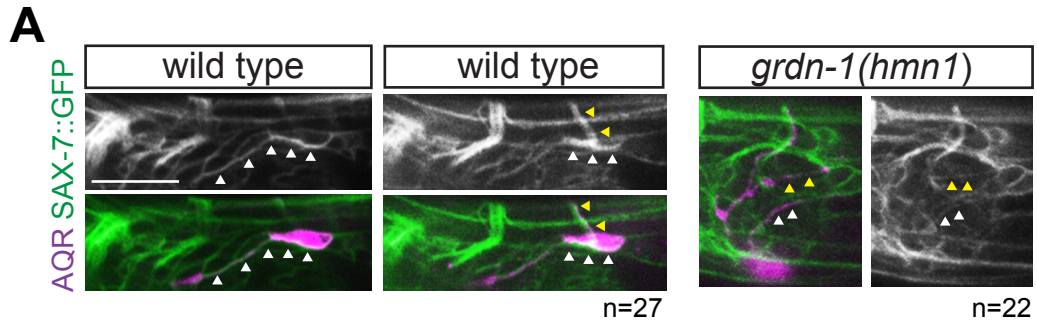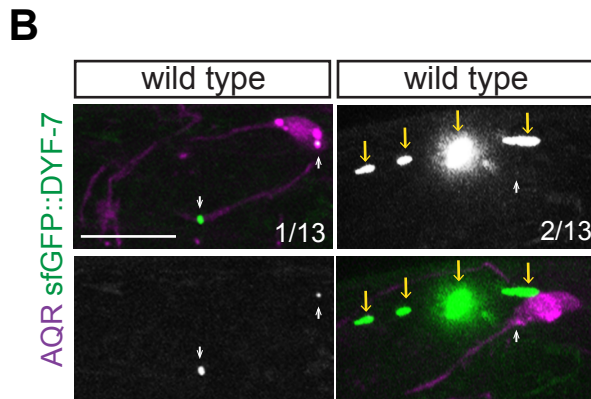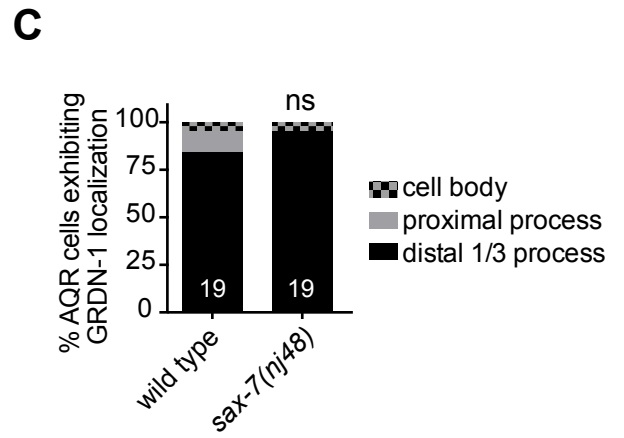

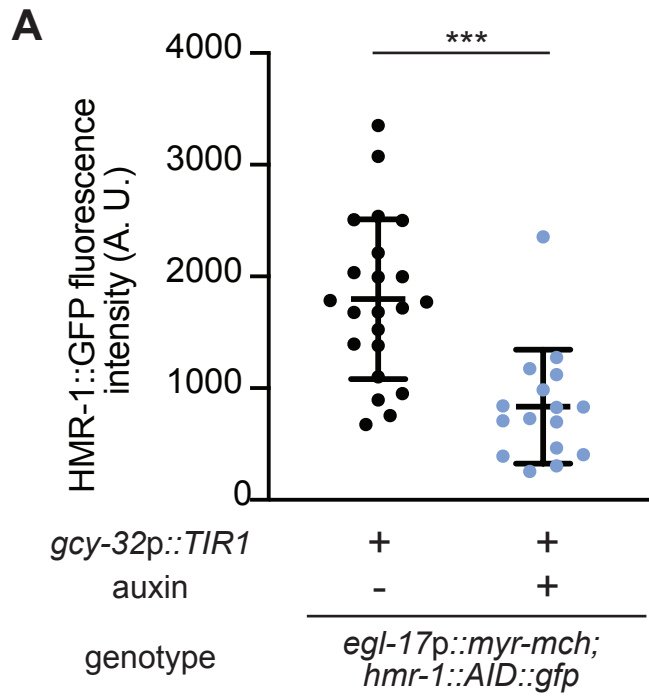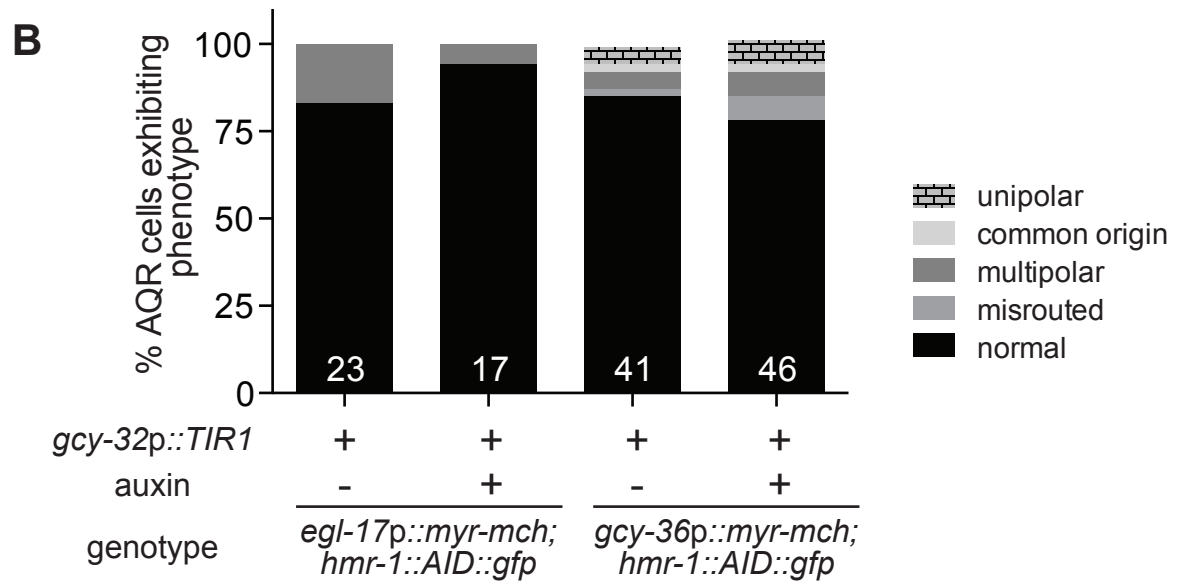

Figure S4

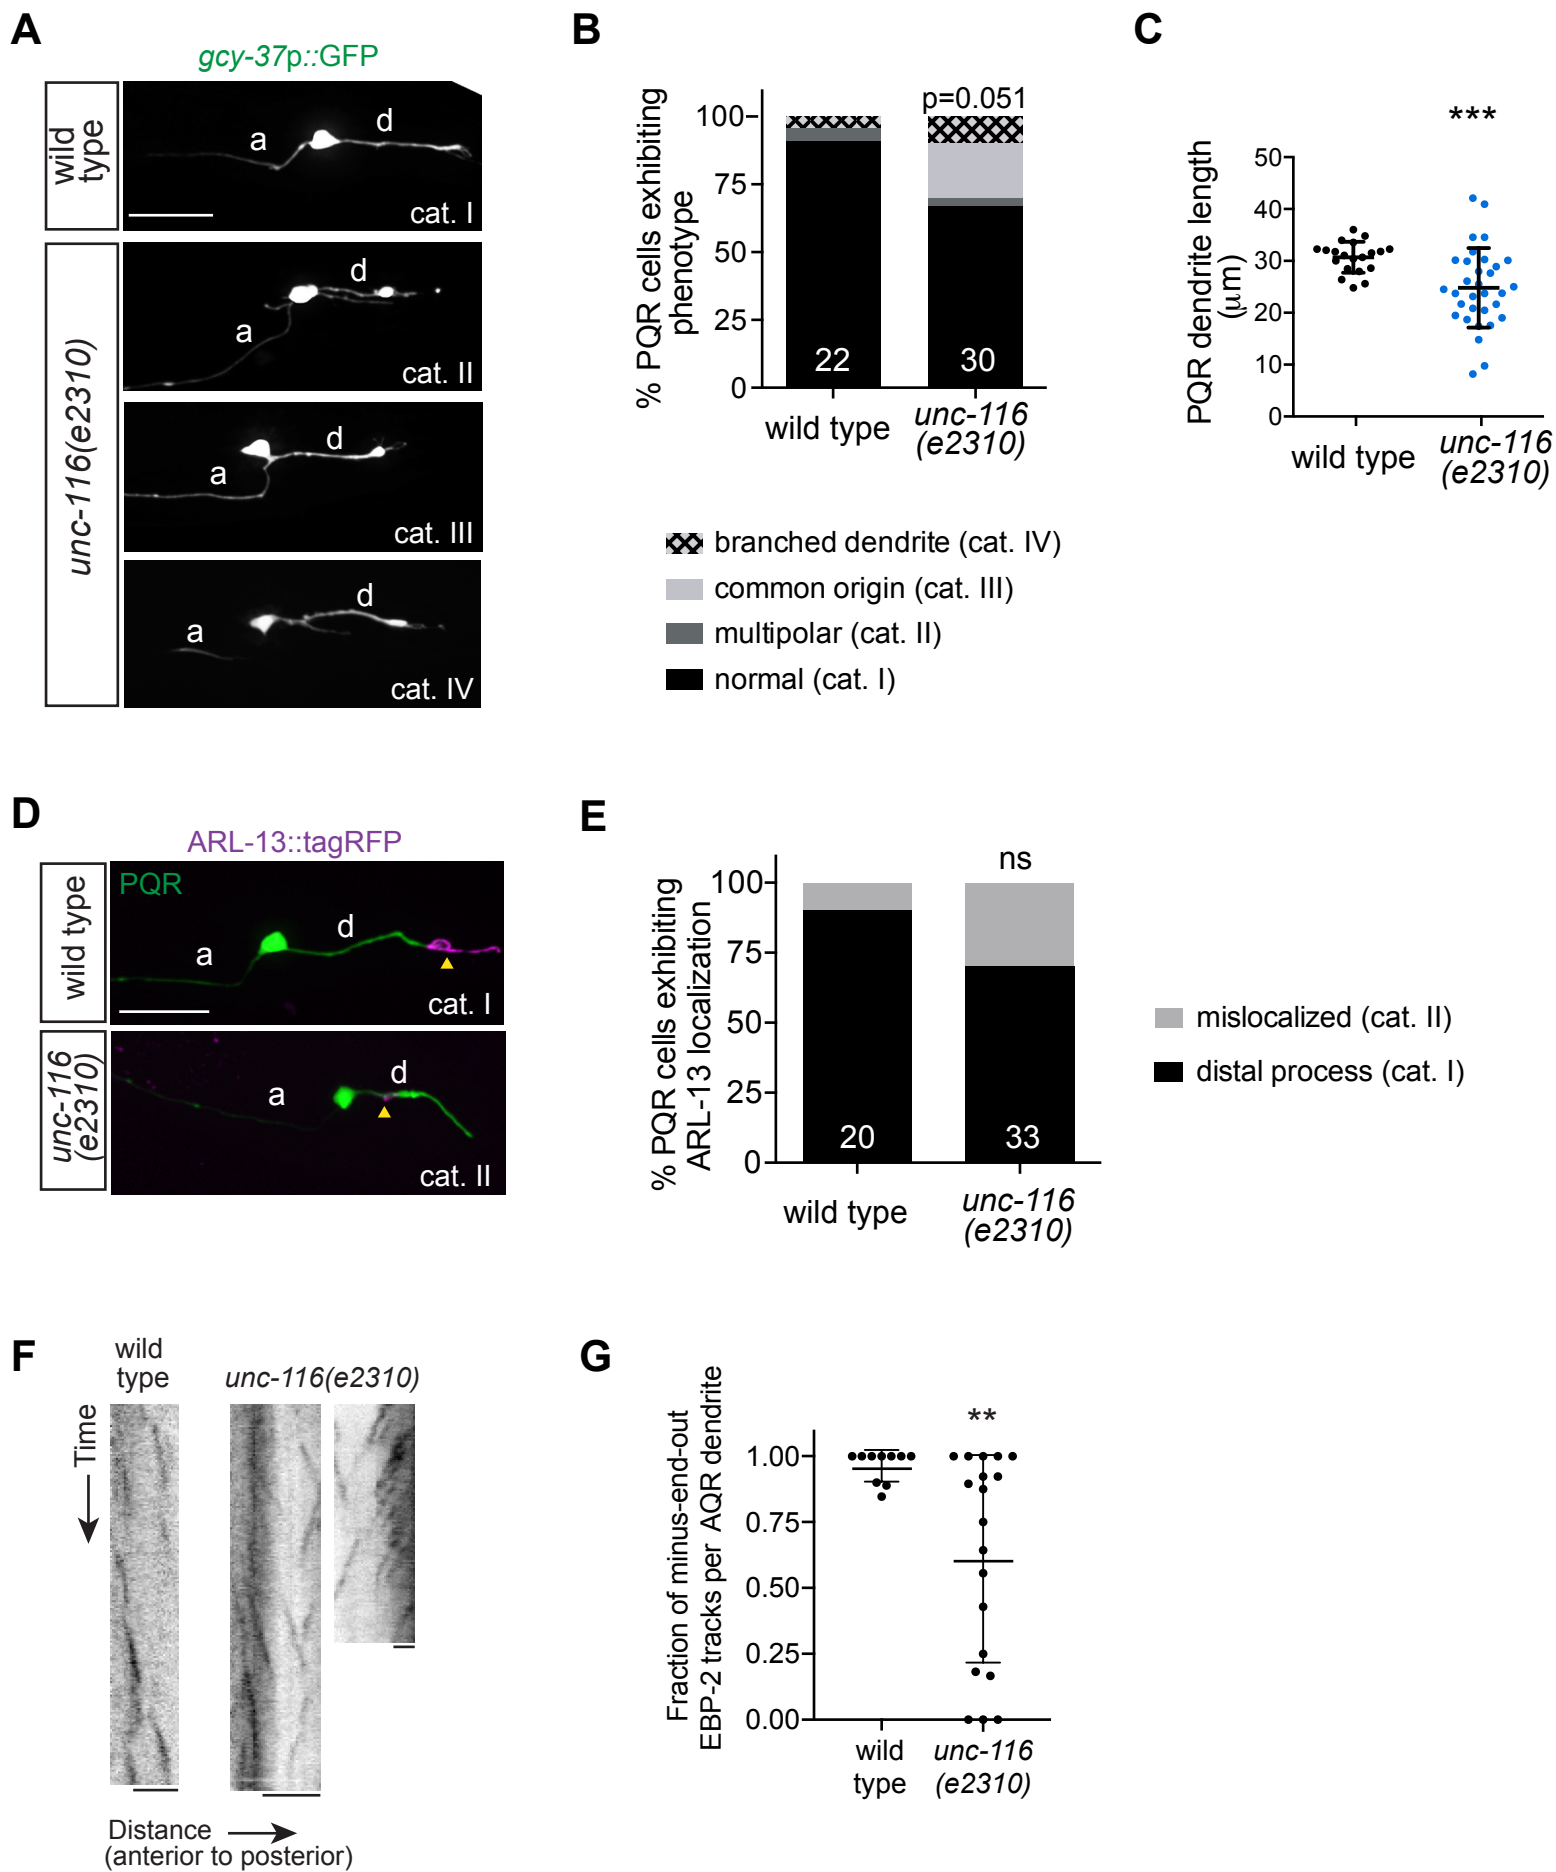

Figure S5
